# Supplementary material for: Comparing Genetic Risk and Clinical Risk Classification in Luminal-like Breast Cancer Patients Using a 23-Gene Classifier
Source: MDPI journal article supplement (doi:10.3390/cancers14246263), 2022-12-19
Supplement: s1 [file s1]

**Table S1. Comparison of the gene list with other MGA**

| MammaPrint<br>70 genes | PAM 50<br>50 genes | Oncotype Dx<br>21 genes | Endopredict<br>11 genes | 23-gene classifier |
|------------------------|--------------------|-------------------------|-------------------------|--------------------|
| ACADS                  | ACTR3B             | ACTB                    | AZGP1                   | DDX39              |
| AKAP2                  | ANLN               | BAG1                    | BIRC5                   | BUB1B              |
| ALDH4                  | BAG1               | BCL2                    | CALM2                   | CCR1               |
| AP2B1                  | BCL2               | BIRC5                   | DHCR7                   | STIL               |
| ASNS                   | BIRC5              | CATL2                   | IL6ST                   | BLM                |
| BBC3                   | BLVRA              | CD68                    | MGP                     | PIM1               |
| BTG2                   | CCNB1              | CCNB1                   | OAZ1                    | TPX2               |
| BUB1                   | CCNE1              | ESR1                    | RBBP8                   | PTI1               |
| CA9                    | CDC20              | GAPDH                   | RPL37A                  | DTX2               |
| CCNB2                  | CDC6               | GRB7                    | STC2                    | RCHY1              |
| CCNE2                  | CDCA1              | GSTM1                   | UBE2C                   | OBSL1              |
| CEGP1                  | CDH3               | GUS                     |                         | CLCA2              |
| CENPA                  | CENPF              | ERBB2                   |                         | CKAP5              |
| CFFM4                  | CEP55              | MKI67                   |                         | YWHAB              |
| COL4A2                 | CXXC5              | MYBL2                   |                         | ESR1               |
| CP                     | EGFR               | PGR                     |                         | PGR                |
| DC13                   | ERBB2              | RPLPO                   |                         | ERBB2              |
| DCK                    | ESR1               | SCUBE2                  |                         | MKI67              |
| DKFZP564D0462          | EXO1               | AURKA                   |                         | ACTB               |
| ECT2                   | FGFR4              | MMP11                   |                         | RPLP0              |
| ESM1                   | FOXA1              | TFRC                    |                         | TFRC               |
| EXT1                   | FOXC1              |                         |                         | PHACTR2            |
| FGF18                  | GPR160             |                         |                         | SF3B5              |
| FLJ10901               | GRB7               |                         |                         |                    |
| FLJ11190               | KIF2C              |                         |                         |                    |
| FLJ11354               | KNTC2              |                         |                         |                    |
| FLJ12443               | KRT14              |                         |                         |                    |
| FLJ20354               | KRT17              |                         |                         |                    |
| FLJ22477               | KRT5               |                         |                         |                    |
| FLT1                   | MAPT               |                         |                         |                    |
| GCN1L1                 | MDM2               |                         |                         |                    |
| GMPS                   | MELK               |                         |                         |                    |
| GNAZ                   | MIA                |                         |                         |                    |
| GSTM3                  | MKI67              |                         |                         |                    |
| HEC                    | MLPH               |                         |                         |                    |
| HSA250839              | MMP11              |                         |                         |                    |
| IGFBP5                 | MYBL2              |                         |                         |                    |
| KIAA0175               | MYC                |                         |                         |                    |
| KIAA1104               | NAT1               |                         |                         |                    |

|          |         |
|----------|---------|
| KIAA1181 | ORC6L   |
| KIAA1442 | PGR     |
| L2DTL    | PHGDH   |
| LOC51203 | PTTG1   |
| LOC57110 | RRM2    |
| MCCC1    | SFRP1   |
| MCM6     | SLC39A6 |
| MMP9     | TMEM458 |
| MMSDH    | TYMS    |
| MP1      | UBE2C   |
| NMU      | UBE2T   |
| ORC6L    |         |
| OXCT     |         |
| PECI     |         |
| PEX12    |         |
| PGK1     |         |
| PK428    |         |
| PRC1     |         |
| QDPR     |         |
| RAB6B    |         |
| RAD21    |         |
| RFC4     |         |
| SERF1A   |         |
| SLC2A3   |         |
| SM-20    |         |
| AURKA    |         |
| STK3     |         |
| TGFB3    |         |
| TMEFF1   |         |
| UCH37    |         |
| WISP1    |         |

Overlapping Gene

House keeping Gene
